# Supplementary material for: Morphology control and multicolor up-conversion luminescence of GdOF:Yb3+/Er3+, Tm3+, Ho3+ nano/submicrocrystals
Source: Royal Society of Chemistry journal article supplement (doi:10.1039/c4cp00817k), 2014-01-01
Supplement: c4cp00817k1.pdf [file c4cp00817k1.pdf]

## Electronic Supplementary Information (ESI)

5

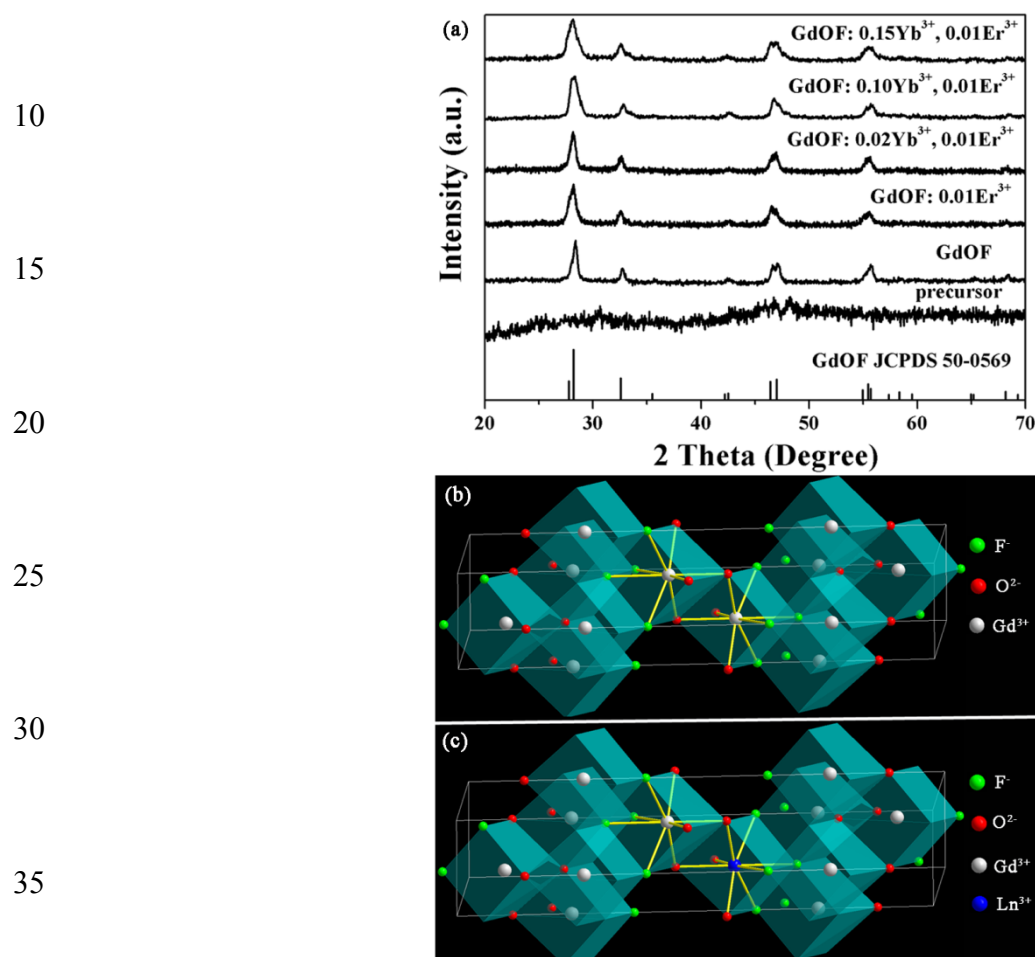

40 **Fig. S1** (a) The XRD patterns of as-prepared precursor samples, annealed at 700 °C, RE<sup>3+</sup> doped samples and the standard data of GdOF (JCPDS No.50-0569). Scheme of the rhombohedral phase GdOF structures (b) un-doped and (c) doped with RE<sup>3+</sup> ions.

5

10

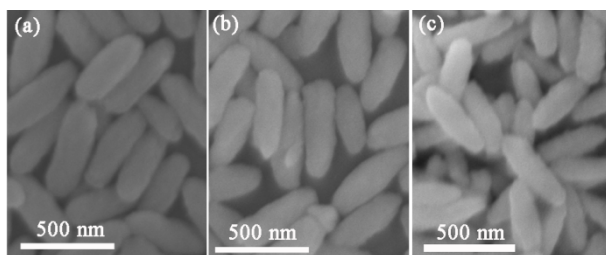

**Fig. S2** SEM images of the GdOF:  $x\text{Yb}^{3+}$ ,  $0.01\text{Er}^{3+}$  samples prepared at  $\text{pH} = 2$  with NaF as  $\text{F}^-$  source with different  $\text{Yb}^{3+}$  concentrations (a)  $x = 0.02$ , (b)  $x = 0.10$  and (c)  $x = 0.20$ .

15

**Table S1** Crystallographic details of GdOF: 0.01Er<sup>3+</sup>, GdOF: 0.02Yb<sup>3+</sup>, 0.01Er<sup>3+</sup> and GdOF: 0.10Yb<sup>3+</sup>, 0.01Er<sup>3+</sup>.

| Formula                    | GdOF: 0.01Er <sup>3+</sup> | GdOF: 0.02Yb <sup>3+</sup> , 0.01Er <sup>3+</sup> | GdOF: 0.10Yb <sup>3+</sup> , 0.01Er <sup>3+</sup> |
|----------------------------|----------------------------|---------------------------------------------------|---------------------------------------------------|
| Crystal system             | rhombohedral               | rhombohedral                                      | rhombohedral                                      |
| Space group                | R3                         | R3                                                | R3                                                |
| <i>a</i> (Å)               | 3.873                      | 3.869                                             | 3.846                                             |
| <i>b</i> (Å)               | 3.873                      | 3.869                                             | 3.846                                             |
| <i>c</i> (Å)               | 19.282                     | 19.228                                            | 19.168                                            |
| <i>V</i> (Å <sup>3</sup> ) | 250.475                    | 249.258                                           | 245.535                                           |
| $\alpha$ (deg)             | 90                         | 90                                                | 90                                                |
| $\beta$ (deg)              | 90                         | 90                                                | 90                                                |
| $\gamma$ (deg)             | 120                        | 120                                               | 120                                               |
| $\chi^2$                   | 3.07                       | 3.08                                              | 3.24                                              |
| <i>R</i> <sub>p</sub> (%)  | 1.92                       | 2.31                                              | 2.12                                              |
| <i>R</i> <sub>wp</sub> (%) | 2.62                       | 3.25                                              | 2.84                                              |
